# Supplementary material
Source: Springer Nature journal article supplement (https://www.springerprofessional.de/resource/supplementary/40702_2021_718_MOESM1_ESM.pdf/19031690)
Supplement: MOESM1 [file 19031690]

## Das Electronic Supplementary Material enthält zusätzliche Informationen zu den durchgeführten Experteninterviews

### Onlinematerial: Übersicht der Organisationen und Teilnehmer für die Experteninterviews

| Pseudonym der Organisation | Beschreibung der digitalen Plattform                                                                         | Position des Experten in der Organisation | Dauer des Interviews |
|----------------------------|--------------------------------------------------------------------------------------------------------------|-------------------------------------------|----------------------|
| ALPHA 1                    | Real-time Tracking Plattform für LKW- und Kuriertransporte                                                   | Geschäftsführer                           | 0:45 h               |
| BETA 2                     | Online-Plattform für B2B Speditions- und Kurierdienstleistungen                                              | Geschäftsführer                           | 1:10 h               |
| GAMMA 3                    | End-to-end Anbieter für digitale Datenservices in der Speditionsbranche                                      | Key Account Manager                       | 1:28 h               |
| DELTA 4                    | Cloud-basierter Logistiksoftware-Anbieter für kleine- und mittelständische Speditionsbetriebe                | Geschäftsführer                           | 0:54 h               |
| EPSILON 5                  | Globaler Betreiber einer Fracht-Plattform für kleine- und mittelständische Transportunternehmen und Verlager | Senior Account Manager                    | 0:59 h               |
| ZETA 6                     | Workflow-basierter Softwareanbieter für Speditionsbetriebe und andere Branchen                               | Key Account Manager                       | 1:00 h               |
| ETA 7                      | IT-Service Spezialist für Cloud-Lösungen in der Transportlogistik                                            | CEO                                       | 1:53 h               |
| THETA 8                    | Multimodaler Serviceanbieter für plattformbasierte Echtzeit-Transparenz und Sichtbarkeit in Lieferketten     | Pre-Sales Manager                         | 1:21 h               |
| IOTA 9                     | Cloud-basierter Anbieter von Compliance-Services für Speditionen und Transportunternehmen                    | Geschäftsführer                           | 1:00 h               |
| KAPPA 10                   | Frachttechnologie- und IT-Service-Anbieter für Transportmanagementsysteme                                    | Sales Director                            | 1:05 h               |
| LAMBDA 11                  | Anbieter einer Logistik-Plattform für Telematik-Systeme                                                      | Head of Sales, Marketing, Support         | 1:09 h               |
